# Supplementary material for: The Serum Profile of Hypercytokinemia Factors Identified in H7N9-Infected Patients can Predict Fatal Outcomes
Source: PubMed Central journal article supplement (PMC4450576; doi:10.1038/srep10942), 2015-06-01
Supplement: srep10942-s1.pdf [file srep10942-s1.pdf]

# Supplementary information

## The Serum Profile of Hypercytokinemia Factors Identified in H7N9-Infected

### Patients can Predict Fatal Outcomes

Jing Guo<sup>1,2\*</sup>, Fengming Huang<sup>3\*</sup>, Jun Liu<sup>4,5\*</sup>, Yu Chen<sup>1,2\*</sup>, Wei Wang<sup>3\*</sup>, Bin Cao<sup>6\*</sup>, Zhen Zou<sup>3</sup>, Song Liu<sup>3</sup>, Jingcao Pan<sup>7</sup>, Changjun Bao<sup>8</sup>, Mei Zeng<sup>9</sup>, Haixia Xiao<sup>10</sup>, Hainv Gao<sup>1,2</sup>, Shigui Yang<sup>1,2</sup>, Yan Zhao<sup>3</sup>, Qiang Liu<sup>3</sup>, Huandi Zhou<sup>3</sup>, Jingdong Zhu<sup>3</sup>, Xiaoli Liu<sup>1,2</sup>, Weifeng Liang<sup>1,2</sup>, Yida Yang<sup>1,2</sup>, Shufa Zheng<sup>1,2</sup>, Jiezuan Yang<sup>1,2</sup>, Hongyan Diao<sup>1,2</sup>, Kunkai Su<sup>1,2</sup>, Li Shao<sup>1,2</sup>, Hongcui Cao<sup>1,2</sup>, Ying Wu<sup>5</sup>, Min Zhao<sup>5</sup>, Shuguang Tan<sup>5</sup>, Hui Li<sup>6</sup>, Xiaoqing Xu<sup>3</sup>, Chunmei Wang<sup>3</sup>, Jianmin Zhang<sup>3</sup>, Li Wang<sup>3</sup>, Jianwei Wang<sup>11</sup>, Jun Xu<sup>12</sup>, Dangsheng Li<sup>13</sup>, Nanshan Zhong<sup>12</sup>, Xuetao Cao<sup>3</sup>, George F Gao<sup>2,4,5,14</sup>, Lanjuan Li<sup>1,2</sup>, Chengyu Jiang<sup>3</sup>

<sup>1</sup>State Key Laboratory for Diagnosis and Treatment of Infectious Diseases, First Affiliated Hospital, College of Medicine, Zhejiang University, Hangzhou 310003, China

<sup>2</sup>Collaborative Innovation Center for Diagnosis and Treatment of Infectious Diseases, Hangzhou, China.

<sup>3</sup>State Key Laboratory of Medical Molecular Biology, Institute of Basic Medical Sciences, Chinese Academy of Medical Sciences, Beijing 100005, China.

<sup>4</sup>National Institute for Viral Disease Control and Prevention, Chinese Center for Disease Control and Prevention, Beijing 102206, China

<sup>5</sup>CAS Key Laboratory of Pathogenic Microbiology and Immunology, Institute of Microbiology, Chinese Academy of Sciences, Beijing 100101, China

<sup>6</sup>Department of Infectious Diseases and Clinical Microbiology, Beijing Chao-Yang Hospital, Beijing Institute of Respiratory Medicine, Capital Medical University, 100020, Beijing, China.

<sup>7</sup>Hangzhou Center for Disease Control and Prevention, Hangzhou 310021, China.

<sup>8</sup>Jiangsu Provincial Center for Disease Control and Prevention, Nanjing 210009, China.

<sup>9</sup>Children's Hospital, Fudan University, Shanghai 201102, China.

<sup>10</sup>Laboratory of Protein Engineering and Vaccine, Tianjin Institute of Industrial Biotechnology, Chinese Academy of Sciences, Tianjin 300308, China.

<sup>11</sup>MOH Key Laboratory of Systems Biology of Pathogens, Institute of Pathogen Biology, Chinese Academy of Medical Sciences and Peking Union Medical College, Beijing 100730, China.

<sup>12</sup>Guangzhou Institute of Respiratory Disease, State Key Laboratory of Respiratory Diseases, First Affiliated Hospital, Guangzhou Medical University, Guangzhou 510120, China.

<sup>13</sup>Shanghai Institutes for Biological Sciences, Chinese Academy of Sciences, Shanghai 200031, China.

<sup>14</sup>Chinese Center for Disease Control and Prevention (China CDC), Beijing 102206, China.

\* These authors contributed equally to this work.

Correspondence should be addressed to C.Y.J (jiang@pumc.edu.cn), L.J.L (ljli@zju.edu.cn) or G.F.G (gaofu@chinacdc.cn).

# Supplementary Figure 1

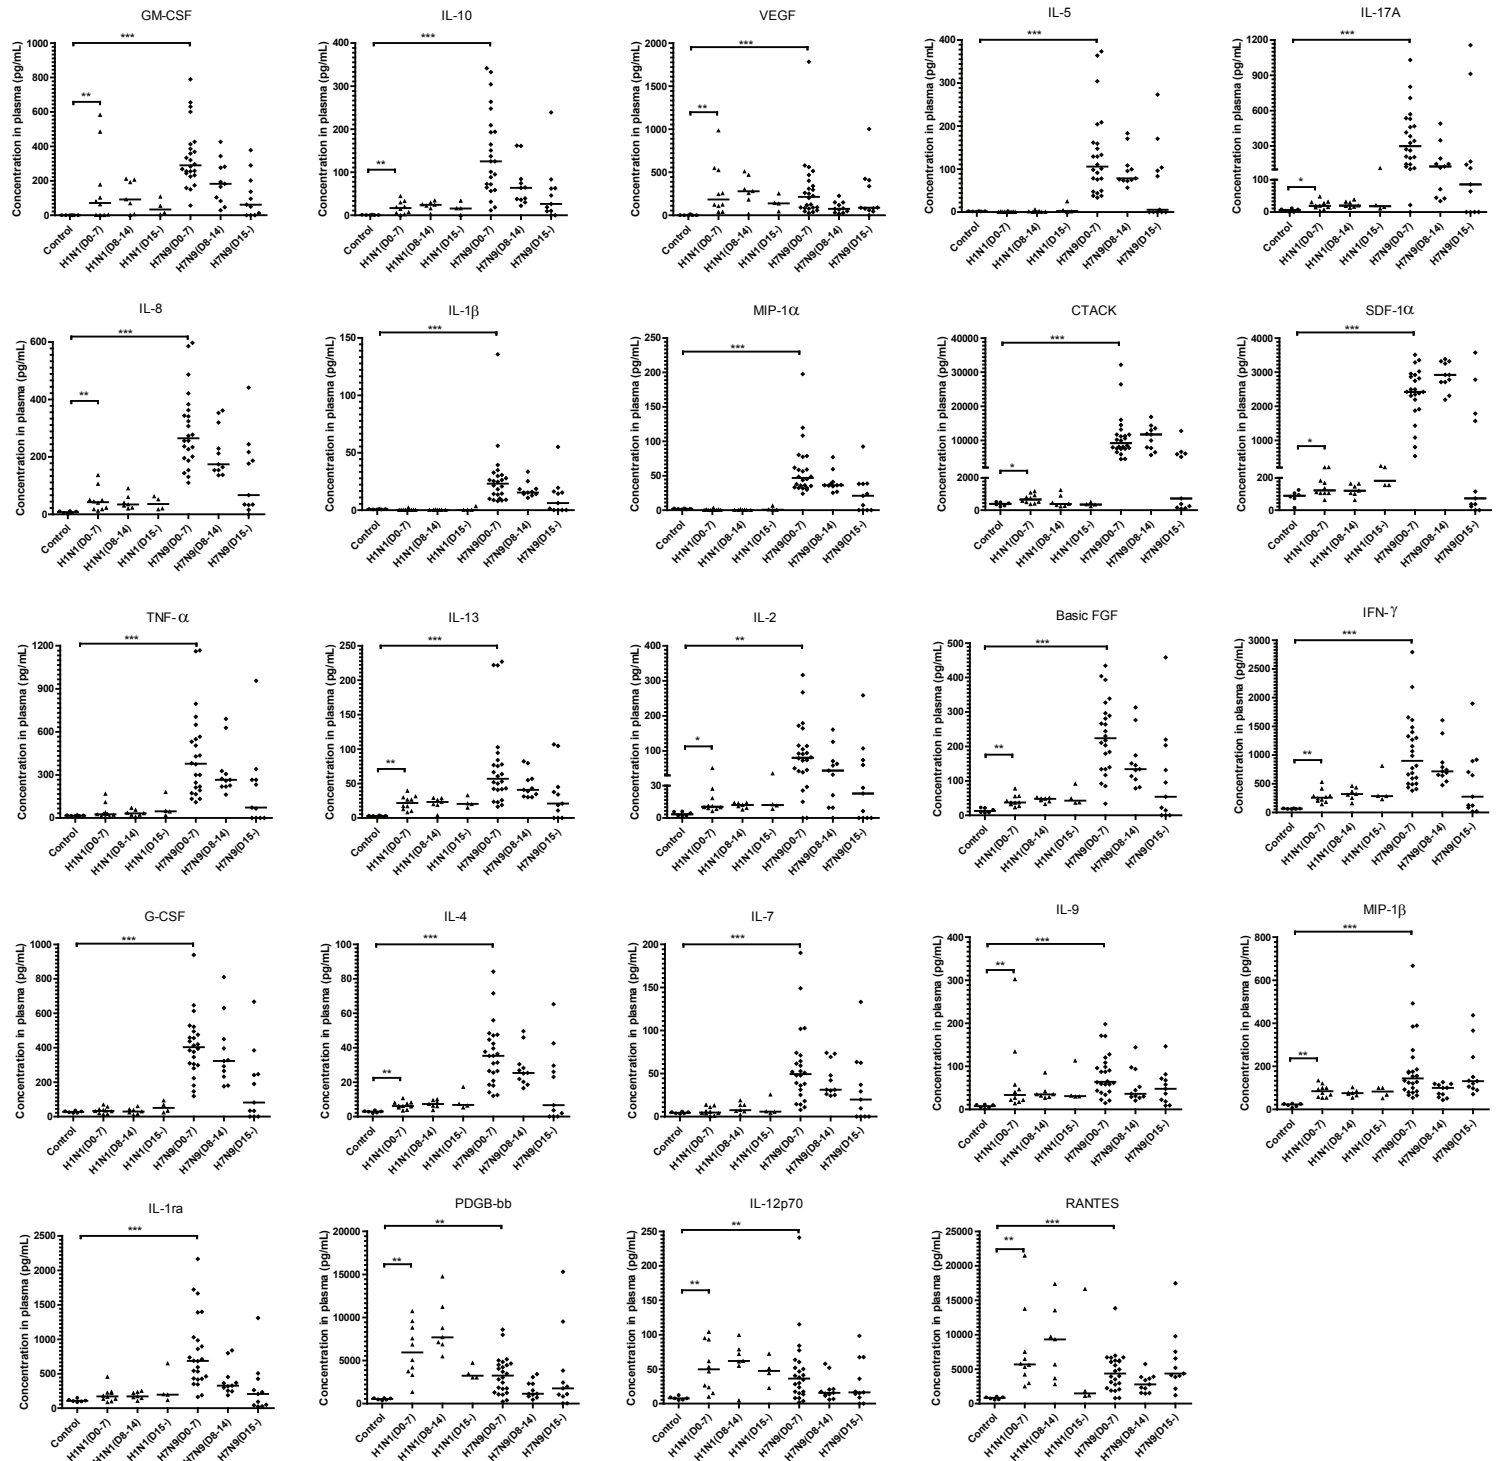

Supplementary Table 1. Cytokine/chemokine Comparison Among 6 healthy controls, 21 H1N1-infected patients and 46 H7N9-infected patients.

|            | Control (n=6) |          | H1N1 (n=21)   |          |                |               |          |                |              |          |                |                | H7N9 (n=46)    |                |           |                |                |          |               |                |          |          |                |                |                |                |                |                |                |
|------------|---------------|----------|---------------|----------|----------------|---------------|----------|----------------|--------------|----------|----------------|----------------|----------------|----------------|-----------|----------------|----------------|----------|---------------|----------------|----------|----------|----------------|----------------|----------------|----------------|----------------|----------------|----------------|
|            |               |          | Day0-7 (n=10) |          |                | Day8-14 (n=7) |          |                | Day15- (n=4) |          |                |                | Day0-7 (n=24)  |                |           | Day8-14 (n=11) |                |          | Day15- (n=11) |                |          |          |                |                |                |                |                |                |                |
|            | Mean          | SD       | Mean          | SD       | p <sup>a</sup> | Mean          | SD       | p <sup>b</sup> | Mean         | SD       | p <sup>c</sup> | p <sup>d</sup> | p <sup>e</sup> | p <sup>f</sup> | Mean      | SD             | p <sup>g</sup> | Mean     | SD            | p <sup>h</sup> | Mean     | SD       | p <sup>i</sup> | p <sup>j</sup> | p <sup>k</sup> | p <sup>l</sup> | p <sup>m</sup> | p <sup>n</sup> | p <sup>o</sup> |
| GM-CSF     | 0.08          | 0.04     | 149.16        | 200.64   | 0.005          | 110.58        | 85.43    | 0.005          | 44.86        | 41.04    | 0.006          | 0.625          | 0.887          | 0.345          | 339.06    | 172.28         | <0.001         | 193.73   | 121.14        | <0.001         | 111.48   | 122.53   | 0.007          | 0.026          | <0.001         | 0.122          | 0.006          | 0.221          | 0.694          |
| IP-10      | 300.24        | 125.48   | 11522.70      | 13861.96 | 0.001          | 7487.00       | 5533.30  | 0.003          | 2144.25      | 1125.56  | 0.011          | 0.922          | 0.066          | 0.450          | 96542.29  | 66191.64       | <0.001         | 54232.48 | 28556.77      | <0.001         | 14333.58 | 24884.23 | 0.021          | 0.088          | <0.001         | 0.003          | <0.001         | 0.002          | 0.794          |
| IL-10      | 0.79          | 0.36     | 17.40         | 13.77    | 0.009          | 21.88         | 9.48     | 0.003          | 16.36        | 11.73    | 0.133          | 0.380          | 0.990          | 0.340          | 144.11    | 95.86          | <0.001         | 70.49    | 46.73         | <0.001         | 50.79    | 65.28    | 0.035          | 0.026          | 0.002          | 0.094          | <0.001         | 0.002          | 0.433          |
| VEGF       | 2.44          | 4.43     | 297.86        | 286.67   | 0.001          | 286.67        | 155.00   | 0.002          | 142.91       | 73.83    | 0.008          | 0.626          | 0.777          | 0.089          | 292.95    | 354.14         | <0.001         | 90.04    | 61.86         | <0.001         | 237.15   | 282.28   | 0.003          | 0.014          | 0.356          | 0.250          | 0.850          | 0.016          | 0.990          |
| IL-6       | 4.10          | 1.12     | 40.32         | 41.57    | 0.001          | 20.73         | 10.86    | 0.003          | 45.91        | 45.00    | 0.011          | 0.660          | 0.671          | 0.990          | 458.11    | 842.75         | <0.001         | 114.10   | 49.48         | <0.001         | 130.63   | 178.33   | 0.035          | 0.002          | 0.006          | 0.533          | <0.001         | <0.001         | 0.514          |
| IL-5       | 1.71          | 0.47     | 0.56          | 0.83     | 0.010          | 1.26          | 1.79     | 0.111          | 7.44         | 10.04    | 0.831          | 0.585          | 0.082          | 0.322          | 133.14    | 95.03          | <0.001         | 99.01    | 39.31         | <0.001         | 66.61    | 86.23    | 0.760          | 0.434          | 0.030          | 0.209          | <0.001         | <0.001         | 0.637          |
| IL-17A     | 5.53          | 4.32     | 21.46         | 12.37    | 0.013          | 23.78         | 8.51     | 0.003          | 39.47        | 41.06    | 0.019          | 0.591          | 0.777          | 0.705          | 348.40    | 250.25         | <0.001         | 159.73   | 134.74        | <0.001         | 239.82   | 382.19   | 0.263          | 0.028          | 0.024          | 0.374          | <0.001         | <0.001         | 0.598          |
| MIG        | 315.66        | 109.49   | 4721.20       | 6676.86  | 0.001          | 3448.07       | 3067.92  | 0.003          | 844.69       | 246.95   | 0.011          | 0.696          | 0.034          | 0.089          | 13436.62  | 15595.19       | <0.001         | 3981.05  | 2103.34       | <0.001         | 1959.72  | 2056.38  | 0.088          | 0.241          | 0.003          | 0.033          | 0.076          | 0.342          | 0.602          |
| IL-8       | 7.02          | 3.79     | 49.41         | 38.76    | 0.001          | 42.41         | 23.01    | 0.003          | 37.72        | 19.63    | 0.011          | 0.922          | 0.990          | 0.705          | 293.28    | 128.54         | <0.001         | 217.84   | 82.97         | <0.001         | 131.89   | 129.64   | 0.007          | 0.095          | 0.002          | 0.139          | <0.001         | <0.001         | 0.296          |
| HGF        | 160.94        | 34.04    | 770.27        | 704.51   | 0.001          | 823.29        | 874.19   | 0.003          | 1051.16      | 1480.78  | 0.134          | 0.845          | 0.157          | 0.186          | 5547.17   | 18788.88       | <0.001         | 793.22   | 514.05        | <0.001         | 2028.33  | 3785.47  | 0.002          | 0.915          | 0.166          | 0.158          | 0.880          | 0.751          | 0.361          |
| MCP-1      | 6.95          | 3.49     | 93.83         | 100.72   | 0.001          | 73.70         | 35.45    | 0.003          | 95.08        | 58.16    | 0.011          | 0.495          | 0.396          | 0.776          | 234.30    | 213.91         | <0.001         | 116.23   | 33.97         | <0.001         | 124.53   | 58.85    | <0.001         | 0.110          | 0.136          | 0.922          | 0.002          | 0.042          | 0.296          |
| IL-1beta   | 0.81          | 0.18     | 0.31          | 0.60     | 0.007          | 0.17          | 0.13     | 0.002          | 0.92         | 1.41     | 0.194          | 0.826          | 0.869          | 0.827          | 26.96     | 25.44          | <0.001         | 17.68    | 6.19          | <0.001         | 11.68    | 15.55    | 0.362          | 0.374          | 0.009          | 0.106          | <0.001         | <0.001         | 0.130          |
| MIP-1alpha | 1.82          | 0.54     | 0.59          | 1.00     | 0.007          | 0.29          | 0.34     | 0.002          | 1.97         | 2.53     | 0.201          | 0.819          | 0.137          | 0.165          | 58.81     | 37.73          | <0.001         | 40.63    | 14.24         | <0.001         | 23.60    | 26.74    | 0.362          | 0.207          | 0.004          | 0.081          | <0.001         | <0.001         | 0.287          |
| CTACK      | 383.74        | 107.84   | 704.29        | 268.40   | 0.017          | 537.18        | 356.67   | 0.775          | 361.24       | 97.06    | 0.831          | 0.143          | 0.016          | 0.705          | 10967.08  | 6259.12        | <0.001         | 10834.17 | 3393.51       | <0.001         | 3484.85  | 3969.94  | 0.482          | 0.456          | <0.001         | 0.001          | <0.001         | <0.001         | 0.433          |
| SDF-1alpha | 83.01         | 34.43    | 138.75        | 47.12    | 0.033          | 122.86        | 34.71    | 0.099          | 190.43       | 37.99    | 0.010          | 0.432          | 0.102          | 0.058          | 2357.38   | 753.90         | <0.001         | 2891.82  | 386.95        | <0.001         | 908.63   | 1246.60  | 0.960          | 0.059          | 0.003          | 0.003          | <0.001         | <0.001         | 0.432          |
| TNF-alpha  | 16.48         | 2.44     | 44.52         | 49.69    | 0.193          | 35.01         | 19.78    | 0.032          | 72.81        | 62.96    | 0.019          | 0.845          | 0.203          | 0.449          | 434.82    | 290.12         | <0.001         | 325.33   | 163.85        | <0.001         | 200.05   | 269.00   | 0.362          | 0.522          | 0.009          | 0.093          | <0.001         | <0.001         | 0.598          |
| IL-13      | 2.94          | 0.57     | 21.76         | 9.85     | 0.001          | 21.27         | 8.04     | 0.004          | 22.10        | 6.58     | 0.011          | 0.922          | 0.777          | 0.990          | 75.13     | 60.61          | <0.001         | 47.50    | 17.98         | <0.001         | 34.46    | 36.68    | 0.131          | 0.241          | 0.017          | 0.107          | <0.001         | <0.001         | 0.793          |
| IL-2       | 3.85          | 1.73     | 16.13         | 12.86    | 0.001          | 11.59         | 2.31     | 0.003          | 16.93        | 10.81    | 0.011          | 0.845          | 0.524          | 0.850          | 94.34     | 77.15          | 0.002          | 54.12    | 18.13         | 0.007          | 50.64    | 74.16    | 0.363          | 0.095          | 0.031          | 0.373          | <0.001         | 0.051          | 0.990          |
| beta-NGF   | 2.00          | 0.33     | 3.47          | 1.24     | 0.001          | 3.16          | 0.65     | 0.005          | 3.48         | 0.67     | 0.010          | 0.731          | 0.476          | 0.448          | 47.61     | 30.17          | <0.001         | 53.22    | 13.96         | <0.001         | 14.49    | 26.94    | 0.208          | 0.384          | <0.001         | 0.002          | <0.001         | <0.001         | 0.695          |
| basic-FGF  | 14.24         | 6.07     | 42.03         | 15.47    | 0.002          | 44.80         | 6.35     | 0.003          | 53.23        | 22.44    | 0.011          | 0.380          | 0.479          | 0.925          | 229.08    | 103.46         | <0.001         | 154.90   | 71.89         | <0.001         | 108.96   | 134.51   | 0.268          | 0.036          | 0.005          | 0.100          | <0.001         | <0.001         | 0.896          |
| IFN-gamma  | 66.70         | 4.69     | 277.00        | 109.63   | 0.001          | 327.71        | 96.23    | 0.003          | 402.00       | 236.77   | 0.010          | 0.205          | 0.257          | 0.705          | 1045.33   | 595.16         | <0.001         | 828.95   | 333.26        | <0.001         | 519.18   | 548.59   | 0.035          | 0.570          | 0.016          | 0.123          | <0.001         | <0.001         | 0.695          |
| G-CSF      | 27.60         | 4.94     | 34.67         | 17.32    | 0.448          | 30.99         | 15.98    | 0.775          | 54.13        | 27.86    | 0.136          | 0.696          | 0.322          | 0.257          | 406.91    | 172.93         | <0.001         | 371.00   | 186.39        | <0.001         | 170.85   | 199.04   | 0.190          | 0.346          | 0.002          | 0.020          | <0.001         | <0.001         | 0.512          |
| IL-4       | 2.86          | 0.54     | 6.47          | 2.05     | 0.002          | 7.25          | 2.02     | 0.003          | 9.01         | 4.78     | 0.011          | 0.407          | 0.524          | 0.925          | 35.95     | 17.48          | <0.001         | 28.06    | 10.15         | <0.001         | 18.10    | 20.49    | 0.365          | 0.207          | 0.012          | 0.139          | <0.001         | <0.001         | 0.990          |
| IL-7       | 4.52          | 0.91     | 6.14          | 4.50     | 0.515          | 9.57          | 5.31     | 0.032          | 10.20        | 8.83     | 0.087          | 0.143          | 0.396          | 0.507          | 56.70     | 42.63          | <0.001         | 43.13    | 19.04         | <0.001         | 32.28    | 39.19    | 0.362          | 0.499          | 0.046          | 0.107          | <0.001         | <0.001         | 0.598          |
| MIF        | 554.46        | 115.89   | 2746.14       | 2300.92  | 0.030          | 1088.45       | 805.83   | 0.086          | 1203.04      | 1088.92  | 0.990          | 0.205          | 0.120          | 0.705          | 6704.86   | 8785.16        | <0.001         | 3968.82  | 2085.60       | <0.001         | 1519.66  | 1243.84  | 0.227          | 0.434          | <0.001         | 0.006          | 0.041          | 0.002          | 0.601          |
| IL-9       | 7.02          | 3.79     | 68.00         | 84.89    | 0.001          | 40.53         | 18.76    | 0.003          | 51.04        | 35.78    | 0.011          | 0.732          | 0.671          | 0.924          | 80.73     | 48.26          | <0.001         | 37.70    | <0.001        | 72.79          | 33.11    | 0.007    | 0.098          | 0.070          | 0.818          | 0.070          | 0.556          | 0.990          |                |
| MIP-1beta  | 20.22         | 7.20     | 85.34         | 26.86    | 0.001          | 75.68         | 14.11    | 0.003          | 79.21        | 20.58    | 0.011          | 0.696          | 0.671          | 0.990          | 191.45    | 148.52         | <0.001         | 88.35    | 28.74         | <0.001         | 176.87   | 115.12   | <0.001         | 0.007          | 0.859          | 0.017          | 0.007          | 0.497          | 0.037          |
| SCF        | 54.46         | 10.21    | 110.14        | 27.31    | 0.002          | 61.29         | 24.99    | 0.943          | 80.54        | 34.20    | 0.011          | 0.005          | 0.203          | 0.450          | 470.99    | 438.46         | 0.008          | 274.65   | 120.33        | <0.001         | 162.74   | 112.44   | 0.035          | 0.374          | 0.026          | 0.045          | <0.001         | <0.001         | 0.191          |
| IL-1ra     | 111.83        | 19.39    | 192.57        | 100.31   | 0.065          | 182.57        | 48.78    | 0.015          | 289.50       | 210.24   | 0.033          | 0.732          | 0.571          | 0.705          | 808.00    | 508.89         | <0.001         | 404.85   | 202.62        | <0.001         | 289.18   | 358.30   | 0.688          | 0.007          | <0.001         | 0.071          | <0.001         | 0.002          | 0.695          |
| IL-18      | 69.89         | 33.36    | 202.13        | 149.90   | 0.030          | 247.41        | 118.95   | 0.004          | 81.42        | 26.57    | 0.286          | 0.425          | 0.090          | 0.014          | 500.35    | 421.82         | 0.002          | 627.91   | 1222.49       | 0.007          | 120.18   | 43.30    | 0.044          | 0.256          | <0.001         | 0.003          | 0.023          | 0.556          | 0.117          |
| PDGF-bb    | 532.04        | 97.67    | 6109.80       | 2903.48  | 0.001          | 8835.57       | 2931.22  | 0.003          | 3551.25      | 700.71   | 0.011          | 0.118          | 0.090          | 0.008          | 3314.97   | 2131.40        | 0.002          | 1635.80  | 949.34        | 0.005          | 3445.35  | 4524.77  | 0.035          | 0.016          | 0.214          | 0.718          | 0.016          | <0.001         | 0.151          |
| IL-12p70   | 7.98          | 2.35     | 52.73         | 33.08    | 0.002          | 61.63         | 27.09    | 0.032          | 47.39        | 17.75    | 0.011          | 0.495          | 0.777          | 0.257          | 46.30     | 48.89          | 0.004          | 21.49    | 16.45         | 0.016          | 22.93    | 28.51    | 0.056          | 0.075          | 0.286          | 0.743          | 0.345          | 0.016          | 0.151          |
| RANTES     | 798.53        | 160.94   | 7547.70       | 5505.60  | 0.001          | 8854.71       | 4907.89  | 0.003          | 5176.50      | 6619.39  | 0.011          | 0.558          | 0.120          | 0.131          | 4618.49   | 2745.17        | <0.001         | 2947.19  | 1253.42       | <0.001         | 6027.62  | 4280.65  | <0.001         | 0.055          | 0.394          | 0.020          | 0.151          | 0.010          | 0.151          |
| SCGF-beta  | 45616.56      | 18076.42 | 73158.57      | 33202.14 | 0.083          | 67878.64      | 45821.33 | 0.568          | 85503.11     | 94715.44 | 0.670          | 0.696          | 0.322          | 0.705          | 111894.60 | 51239.37       | 0.001          | 80444.73 | 23216.23      | 0.016          | 90322.47 | 25575.08 | 0.005          | 0.062          | 0.214          | 0.250          | 0.019          | 0.497          | 0.151          |

- a: Compare between Control and H1N1 Day0-7 groups
- b: Compare between Control and H1N1 Day8-14 groups
- c: Compare between Control and H1N1 Day15- groups
- d: Compare between H1N1 Day0-7 and H1N1 Day8-14 groups
- e: Compare between H1N1 Day0-7 and H1N1 Day15- groups
- f: Compare between H1N1 Day8-14 and H1N1 Day15- groups
- g: Compare between Control and H7N9 Day0-7 groups
- h: Compare between Control and H7N9 Day8-14 groups
- i: Compare between Control and H7N9 Day15- groups
- j: Compare between H7N9 Day0-7 and H7N9 Day8-14 groups
- k: Compare between H7N9 Day0-7 and H7N9 Day15- groups
- l: Compare between H7N9 Day8-14 and H7N9 Day15- groups
- m: Compare between H1N1 Day0-7 and H7N9 Day0-7 groups
- n: Compare between H1N1 Day8-14 and H7N9 Day8-14 groups
- o: Compare between H1N1 Day15- and H7N9 Day15- groups

# Supplementary Figure 2

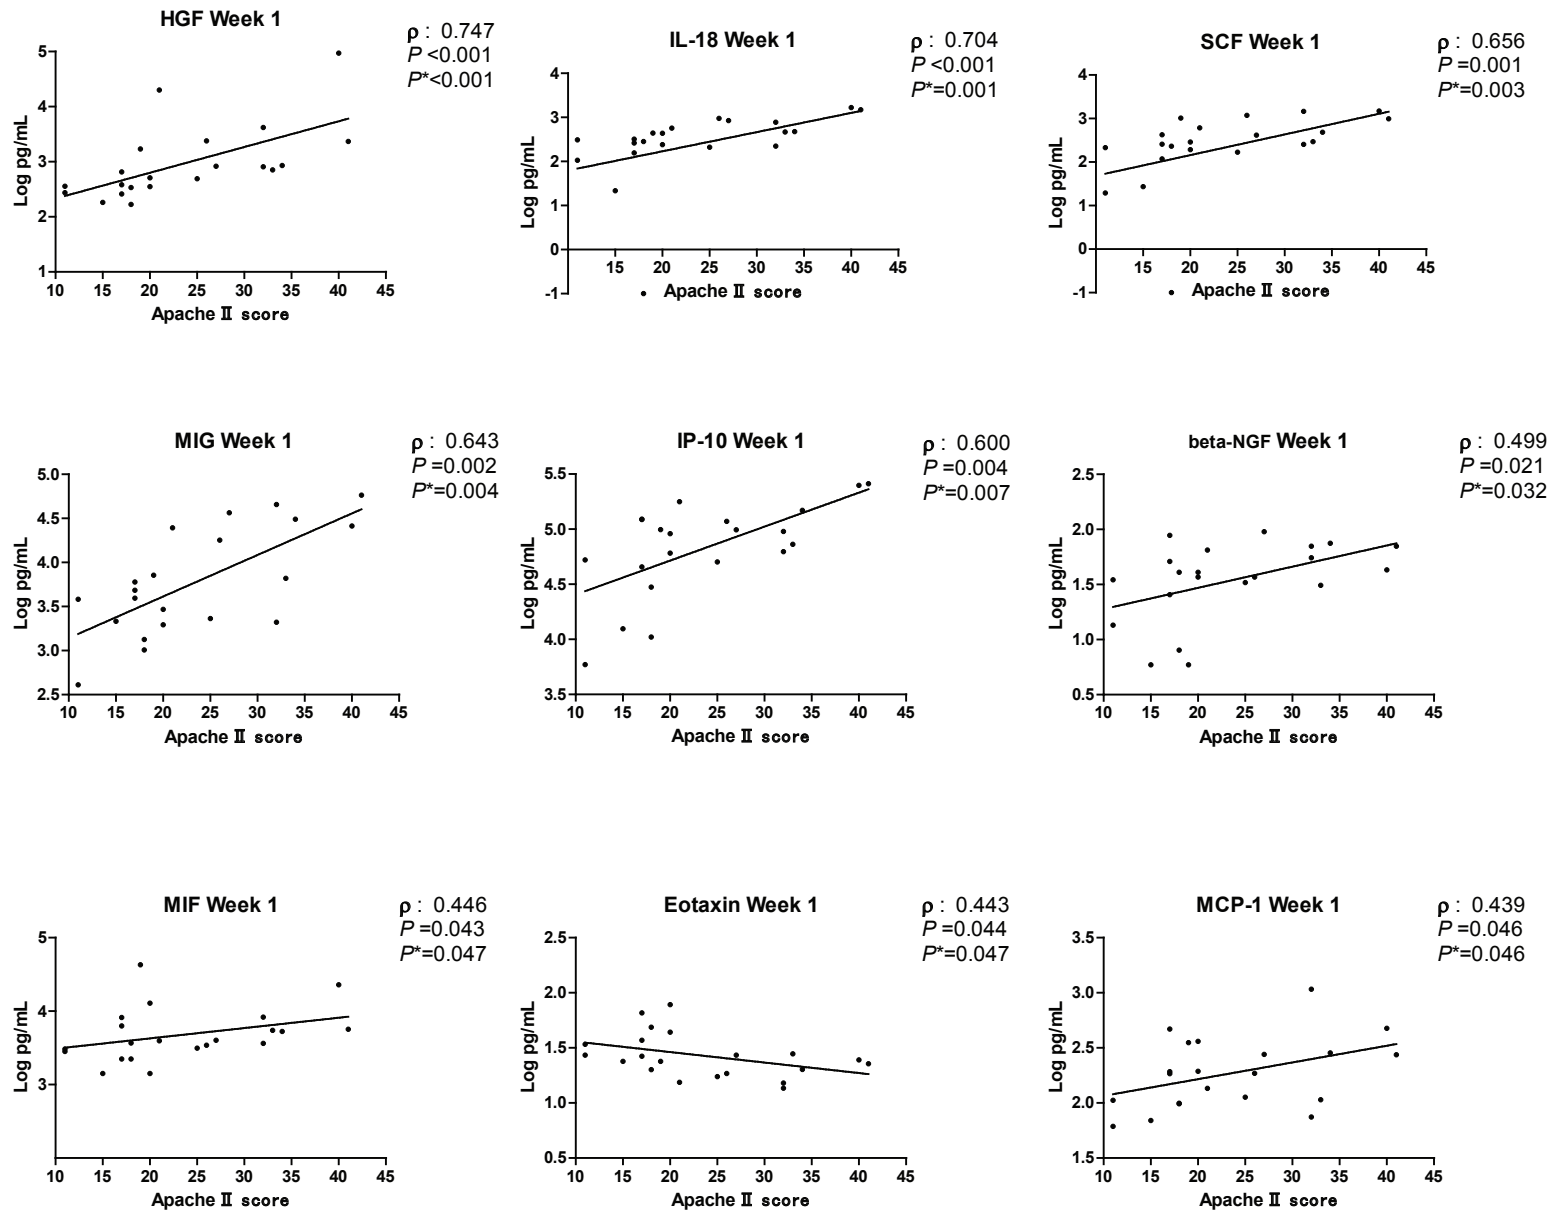

# Supplementary Figure 3

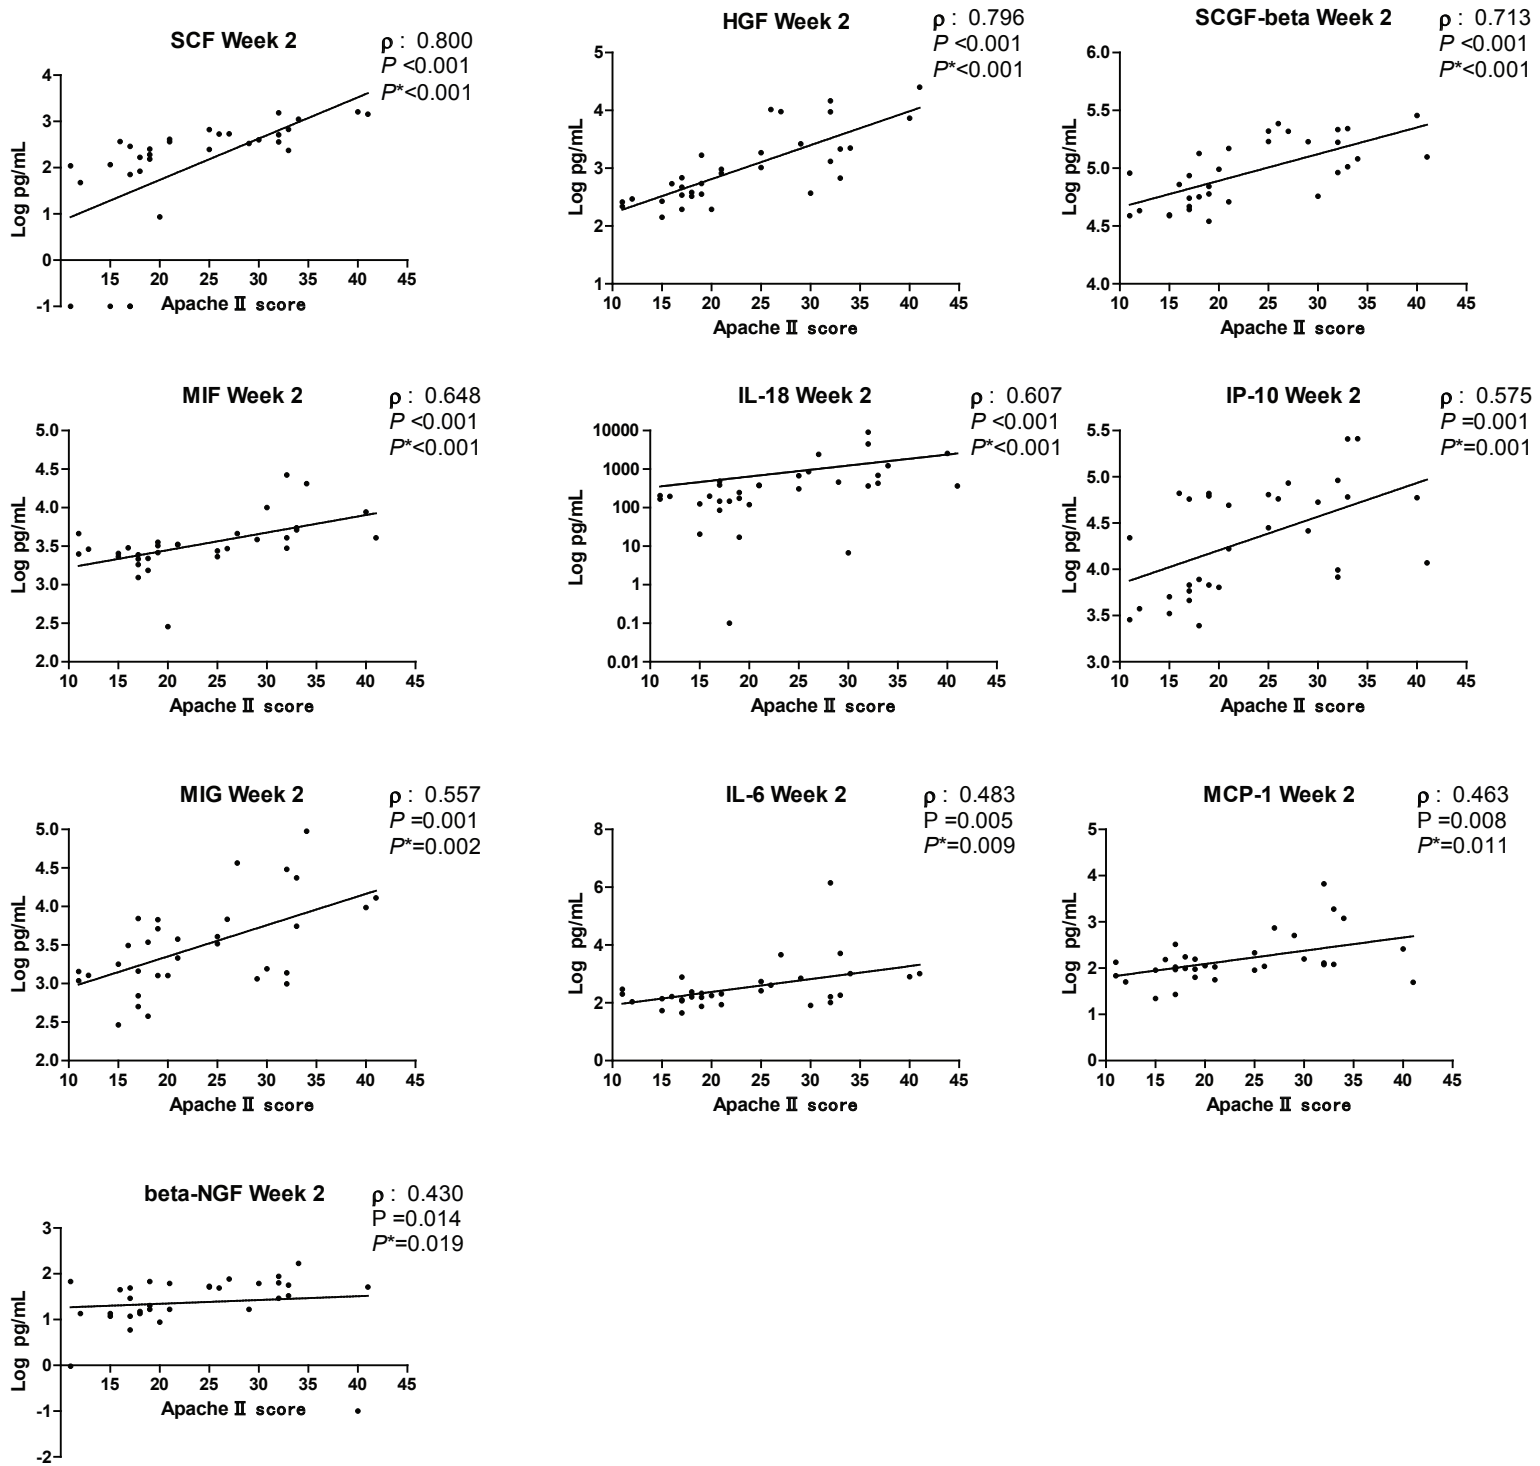

**Supplementary Table 2. Outcomes in H7N9-infected Patients**

| Cyto/Chemokines | Week1                      |          |            |          | P Value | Week2                      |          |            |          | P Value |
|-----------------|----------------------------|----------|------------|----------|---------|----------------------------|----------|------------|----------|---------|
|                 | Hospitalized<28 days(n=12) |          | Death(n=5) |          |         | Hospitalized<28 days(n=16) |          | Death(n=8) |          |         |
|                 | Mean                       | SD       | Mean       | SD       |         | Mean                       | SD       | Mean       | SD       |         |
| MIF             | 6788.97                    | 11052.77 | 8350.28    | 7592.12  | >0.05   | 2478.12                    | 976.28   | 10230.90   | 8136.02  | <0.001  |
| MCP-1           | 185.02                     | 119.67   | 395.86     | 373.37   | >0.05   | 104.44                     | 68.94    | 1143.97    | 2113.30  | 0.001   |
| SCF             | 334.60                     | 296.80   | 748.49     | 608.28   | >0.05   | 144.21                     | 129.21   | 762.14     | 530.10   | 0.001   |
| HGF             | 2142.40                    | 5417.31  | 19960.04   | 36874.91 | >0.05   | 516.96                     | 384.82   | 4824.59    | 4796.72  | 0.002   |
| SCGF-beta       | 106784.14                  | 57776.73 | 127463.78  | 47259.38 | >0.05   | 73015.19                   | 36486.71 | 151362.42  | 69428.71 | 0.004   |
| IP-10           | 81233.46                   | 58401.52 | 120058.92  | 73759.23 | >0.05   | 19832.99                   | 21839.53 | 70899.03   | 75499.28 | 0.008   |
| IL-18           | 335.58                     | 267.76   | 653.74     | 553.92   | >0.05   | 193.28                     | 142.20   | 2326.10    | 2917.72  | 0.008   |

**Supplementary Table 3. ROC Curve of Cytokine/Chemokines in The Second Week H7N9-infected Illness Onset**

| Cyto/Chemokines | Area under the ROC curve | P value | Std. Errora | 95% Confidence Interval |             |
|-----------------|--------------------------|---------|-------------|-------------------------|-------------|
|                 |                          |         |             | Lower Bound             | Upper Bound |
| MIF             | 0.953                    | <0.001  | 0.041       | 0.874                   | 1.000       |
| SCF             | 0.93                     | 0.001   | 0.050       | 0.831                   | 1.000       |
| MCP-1           | 0.906                    | 0.001   | 0.060       | 0.788                   | 1.000       |
| HGF             | 0.891                    | 0.002   | 0.073       | 0.747                   | 1.000       |
| SCGF-beta       | 0.867                    | 0.004   | 0.075       | 0.721                   | 1.000       |
| IL-18           | 0.836                    | 0.008   | 0.112       | 0.617                   | 1.000       |
| IP-10           | 0.836                    | 0.008   | 0.082       | 0.676                   | 0.996       |
| IFN-gamma       | 0.777                    | 0.03    | 0.111       | 0.561                   | 0.994       |
| beta-NGF        | 0.719                    | >0.05   | 0.123       | 0.477                   | 0.960       |
| IL-6            | 0.719                    | >0.05   | 0.121       | 0.482                   | 0.955       |
| MIG             | 0.664                    | >0.05   | 0.126       | 0.418                   | 0.910       |
| IL-8            | 0.637                    | >0.05   | 0.130       | 0.382                   | 0.891       |
| MIP-1beta       | 0.625                    | >0.05   | 0.138       | 0.355                   | 0.895       |
| SDF-1alpha      | 0.586                    | >0.05   | 0.131       | 0.329                   | 0.843       |
| CTACK           | 0.57                     | >0.05   | 0.138       | 0.299                   | 0.842       |
| MIP-1alpha      | 0.551                    | >0.05   | 0.138       | 0.281                   | 0.820       |
| IL-1ra          | 0.535                    | >0.05   | 0.135       | 0.271                   | 0.799       |
| IL-9            | 0.523                    | >0.05   | 0.133       | 0.262                   | 0.785       |
| IL-10           | 0.52                     | >0.05   | 0.139       | 0.247                   | 0.792       |
| G-CSF           | 0.504                    | >0.05   | 0.137       | 0.235                   | 0.772       |
| IL-7            | 0.477                    | >0.05   | 0.136       | 0.210                   | 0.744       |
| IL-5            | 0.453                    | >0.05   | 0.135       | 0.189                   | 0.717       |
| GM-CSF          | 0.422                    | >0.05   | 0.137       | 0.153                   | 0.691       |
| IL-1beta        | 0.422                    | >0.05   | 0.136       | 0.156                   | 0.688       |
| IL-4            | 0.414                    | >0.05   | 0.136       | 0.148                   | 0.680       |
| VEGF            | 0.406                    | >0.05   | 0.138       | 0.135                   | 0.677       |
| TNF-alpha       | 0.402                    | >0.05   | 0.136       | 0.135                   | 0.670       |
| IL-13           | 0.391                    | >0.05   | 0.128       | 0.141                   | 0.641       |
| IL-2            | 0.391                    | >0.05   | 0.129       | 0.138                   | 0.644       |
| basic-FGF       | 0.344                    | >0.05   | 0.126       | 0.097                   | 0.590       |
| IL-12p70        | 0.34                     | >0.05   | 0.127       | 0.091                   | 0.589       |
| PDGF-bb         | 0.336                    | >0.05   | 0.118       | 0.104                   | 0.568       |
| IL-17A          | 0.258                    | >0.05   | 0.104       | 0.054                   | 0.461       |
| RANTES          | 0.188                    | >0.05   | 0.093       | 0.006                   | 0.369       |

### Supplementary Figure 4

|                  |                  |              |              |              |            |            |            |                  |
|------------------|------------------|--------------|--------------|--------------|------------|------------|------------|------------------|
| <b>IFN-gamma</b> | 1.00             |              |              |              |            |            |            |                  |
| <b>MCP-1</b>     |                  | 1.00         |              |              |            |            |            |                  |
| <b>IL-18</b>     |                  |              | 1.00         |              |            |            |            |                  |
| <b>IP-10</b>     | 0.72             | 0.53         | 0.57         | 1.00         |            |            |            |                  |
| <b>HGF</b>       | 0.45             | 0.48         | 0.67         | 0.68         | 1.00       |            |            |                  |
| <b>MIF</b>       | 0.60             | 0.51         | 0.46         | 0.68         | 0.64       | 1.00       |            |                  |
| <b>SCF</b>       | 0.49             | 0.51         | 0.62         | 0.75         | 0.77       | 0.70       | 1.00       |                  |
| <b>SCGF-beta</b> |                  | 0.65         | 0.62         | 0.55         | 0.69       | 0.51       | 0.64       | 1.00             |
|                  | <b>IFN-gamma</b> | <b>MCP-1</b> | <b>IL-18</b> | <b>IP-10</b> | <b>HGF</b> | <b>MIF</b> | <b>SCF</b> | <b>SCGF-beta</b> |



**Supplementary Table 4. Comparison Among H7N9, 2009 S-OIV, URTI, H5N1 and SARS Induced Plasma Chemokine and Cytokine Levels.**

|              | H7N9 (n=24)  | p <sup>1</sup> | H1N1 (n=14)    | p <sup>2</sup> | URTI(n=15) [Ref18,27] | H5N1(n=16) <sup>3</sup> [Ref12] |
|--------------|--------------|----------------|----------------|----------------|-----------------------|---------------------------------|
| <b>MCP-1</b> | 2.3(1.8-3.0) | < 0.001        | 1.5 (-0.7-2.9) | < 0.001        | 1.6 (und-2.1)         | 2.4 (1.5-4.0)                   |
| <b>IP-10</b> | 5.0(3.8-5.4) | < 0.001        | 1.7 (0.4-4.6)  | < 0.001        | 3.5 (2.3-4.2)         | 5.1 (3.5-6.3)                   |
| <b>IFN-γ</b> | 3.0(2.6-3.4) | < 0.001        | 2.0 (0.4-3.0)  | < 0.001        | 2.0 (und-2.4)         | 2.0 (und.-4.2)                  |
| <b>IL-6</b>  | 2.3(1.7-3.6) | < 0.001        | 1.5 (0.6-1.9)  | < 0.001        | 1.2 (und-1.6)         | 2.1 (und.-3.7)                  |
| <b>MIG</b>   | 3.7(2.6-4.8) |                |                |                |                       | 4.3 (3.1-5.2)                   |
| <b>IL-8</b>  | 2.4(2.0-2.8) | < 0.001        | 1.1 (0.2-2.4)  | < 0.001        | 0.7 (und-1.5)         | 2.0 (0.7-3.2)                   |
| <b>IL-10</b> | 2.1(1.1-2.5) | < 0.001        | 0.2 (0.2-2.0)  | < 0.001        | und (und-1.4)         | 1.5 (und.-2.8)                  |

Levels are given as median log pg/mL (range). URTI., upper respiratory tract infection. und., undetectable.

<sup>1</sup>Comparison between H7N9 (0-7 d of illness onset) and 2009 swine flu (0-8 d of illness onset) patients. <sup>2</sup>Comparison between H7N9 (0-7 d of illness) and 2009 URTI patients. <sup>3</sup>The blood specimens of patients infected with H5N1 were obtained 4-8 d of illness onset.

|               | H7N9                          |                                | SARS [Ref28]                   |                                 |
|---------------|-------------------------------|--------------------------------|--------------------------------|---------------------------------|
|               | 0-7 d of illness onset (n=24) | 8-14 d of illness onset (n=11) | 0-7 d of illness onset (n=126) | 8-14 d of illness onset (n=129) |
| <b>MCP-1</b>  | 185.1(184.1)                  | 185.1(184.1)                   | 48.8 (26.0-94.0)               | 31.6 (14.9-68.0)                |
| <b>IP-10</b>  | 93096.4(83859.1)              | 93096.0(83862.0)               | 4020 (2520-6265)               | 2695 (945-4760)                 |
| <b>RANTES</b> | 4361.8(3880.8)                | 4361.8(3880.8)                 | 29 800 (18 900-33 720)         | 32 500 (16 200-36 600)          |
| <b>MIG</b>    | 5418.1(20870.9)               | 5418.1(20871.2)                | 540 (375-918)                  | 612 (360-1032)                  |
| <b>IL-8</b>   | 265.0(161.2)                  | 265.0(161.2)                   | 11.7 (6.6-31.7)                | 8.9 (5.4-32.8)                  |

Levels are given as median pg/mL (IQR).

|               | H7N9(0-14 d of illness onset, n=35) | SARS(progressive stage, n=23) [Ref17] |
|---------------|-------------------------------------|---------------------------------------|
| <b>MCP-1</b>  | 194.2±189.1                         | 475±1000                              |
| <b>IP-10</b>  | 83245.0±61267.3                     | 8100±2300                             |
| <b>IFN-γ</b>  | 977.3±544.4                         | 85±35                                 |
| <b>IL-6</b>   | 350.0±726.9                         | 120±160                               |
| <b>IL-8</b>   | 270.0±123.1                         | 750±1420                              |
| <b>MIP-1α</b> | 53.1±33.8                           | 1790±2880                             |

Levels are given as means pg/mL ± SD.

## Figure Legend

### **Supplementary Figure 1. Hypercytokinemia in Avian Influenza A (H7N9) Virus-Infected Patients**

A total of 46 patients infected with the avian influenza A (H7N9) virus, 21 patients infected with the swine-origin influenza A (H1N1) virus and 6 healthy controls were recruited for this study. Their plasma levels of chemokines and cytokines at 0-7 days (n=24), 8-14 days (n=11) and 15 days (n=11) after the onset of the disease were measured. Detailed information is shown in supplementary table 1. \* $P < 0.05$ , \*\* $P < 0.01$ , \*\*\* $P < 0.001$ .

### **Supplementary Figure 2. The APACHE II Score was Correlated with the Plasma Levels of Chemokines and Cytokines and with Clinical Characteristics in The First Week of Disease Onset in Avian Influenza A (H7N9) Virus-Infected Patients.**

Correlations between the APACHE II score and the plasma chemokine and cytokine (HGF, IL-18, SCF, MIG, IP-10, IL-6, MIF, Eotaxin, MCP-1) levels in the first week of influenza H7N9 infection for 21 patients. Spearman's rank correlation analysis ( $\rho$ ),  $P$  value and the Benjamini & Hochberg multiple testing correction ( $P^*$ ) to control for the false discovery rate (FDR) are shown in each graph.

### **Supplementary Figure 3. The APACHE II Score was Correlated with the Plasma Levels of Chemokines and Cytokines and with Clinical Characteristics in the Second Week of Disease Onset in Avian Influenza A (H7N9) Virus-Infected Patients.**

Correlations between the APACHE II score and the plasma chemokine and cytokine levels (SCF, HGF, SCGF- $\beta$ , MIF, IL-18, IP-10, MIG, IL-6, MCP-1,  $\beta$ -NGF) in the second week of influenza H7N9 infection in 32 patients. Spearman's rank correlation analysis ( $\rho$ ),  $P$  value and the Benjamini & Hochberg multiple testing correction ( $P^*$ ) to control for the false discovery rate (FDR) are shown in each graph.

### **Supplementary Figure 4. Correlation Heatmap of Plasma Cytokine/Chemokines Levels in the Second Week of H7N9-infected Illness Onsets.**

Spearman's rank correlation analysis between the plasma chemokine and cytokine levels (SCF, HGF, SCGF- $\beta$ , MIF, IL-18, IP-10, IFN- $\gamma$ , MCP-1) in the second week of influenza H7N9 infection. The blank represents the Spearman's rank correlation analysis'  $P$  value  $> 0.05$ .

**Supplementary Table 1.** Cytokine/chemokine Comparison Among 6 Healthy Controls, 21 H1N1-infected Patients and 46 H7N9-infected Patients.

**Supplementary Table 2.** Outcomes in H7N9-infected Patients

**Supplementary Table 3.** ROC Curve of Cytokine/Chemokines during the Second Week H7N9 Infection

**Supplementary Table 4.** Comparison among H7N9, 2009 S-OIV, URTI, H5N1 and SARS Induced Plasma Chemokine and Cytokine Levels
